# Supplementary material
Source: MDPI journal article supplement (https://www.mdpi.com/2073-445X/12/7/1271)
Supplement: s1 [file s1 › land-2407502-supplementary.pdf]

**Table S1:** Airborne Research Australia (ARA) instruments used for aerial monitoring.

| Instrument                                                              | Type                                | Sampling          | Other                                          |
|-------------------------------------------------------------------------|-------------------------------------|-------------------|------------------------------------------------|
| Specim AISA Eagle 2 (ARA-modified)                                      | VNIR hyperspectral line scanner     | 30cm              | 62 spectral bands from 400 to 1000nm           |
| Riegl ALS Q680i                                                         | Full waveform small footprint lidar | 400 kHz PRF       | Allows DTM and canopy model at 0.5m sampling   |
| Canon EOD 5D mk4 with Canon L2 24mm lens                                | DSLR (RGB aerial photography)       | 10cm              | Images collected every 4 seconds during survey |
| Oxford Technical Solutions xNav500                                      | INS (intertrial navigation system)  | Sampling at 100Hz | Close-coupled to Eagle hyperspectral scanner   |
| Novatel SPAN system: LITEF tactical grade IMU with Novatel GPS receiver | Precision fibre-optic gyro INS      | Sampling at 150Hz | Close coupled to lidar and DSLR                |

**Table S2:** Range of Satellites (commercial and freely available) for gathering multispectral satellite imagery.

| Satellite      | Spatial Resolution           | Spectral Resolution                   | Temporal Resolution | Data Availability |
|----------------|------------------------------|---------------------------------------|---------------------|-------------------|
| Landsat 4 MSS  | 60 m                         | 4 bands (RGB, NIR)                    | 16 days             | 1982 - 1993       |
| Landsat 7 ETM+ | 30 – 60 m                    | 8 bands (VNIR, SWIR, TIR, MIR, Pan)   | 16 days             | 1999 - current    |
| Landsat 8 OLI  | 15 – 30 m                    | 11 bands (VNIR, SWIR, Pam, TIR)       | 16 days             | 2013 - current    |
| Sentinel 2B    | 10 - 20 m                    | 13 bands (VNIR, SWIR)                 | 5 days              | 2017 - current    |
| GeoEye-1       | 0.50 – 1.85 m                | 4 bands (VNIR, Pan)                   | 8 days              | 2008 - current    |
| WorldView-3    | 0.31 / 1.24 m / 3.7 m / 30 m | 28 bands (VNIR, Pan, MS, SWIR, CAVIS) | <1 day              | 2014 - current    |
| Terra MODIS    | 250 m – 1 km                 | 36 bands (VNIR, SWIR)                 | 1 – 2 days          | 1999 - current    |
| PlanetScope    | 3 m                          | 4 bands (VNIR)                        | daily               | 2016 - current    |

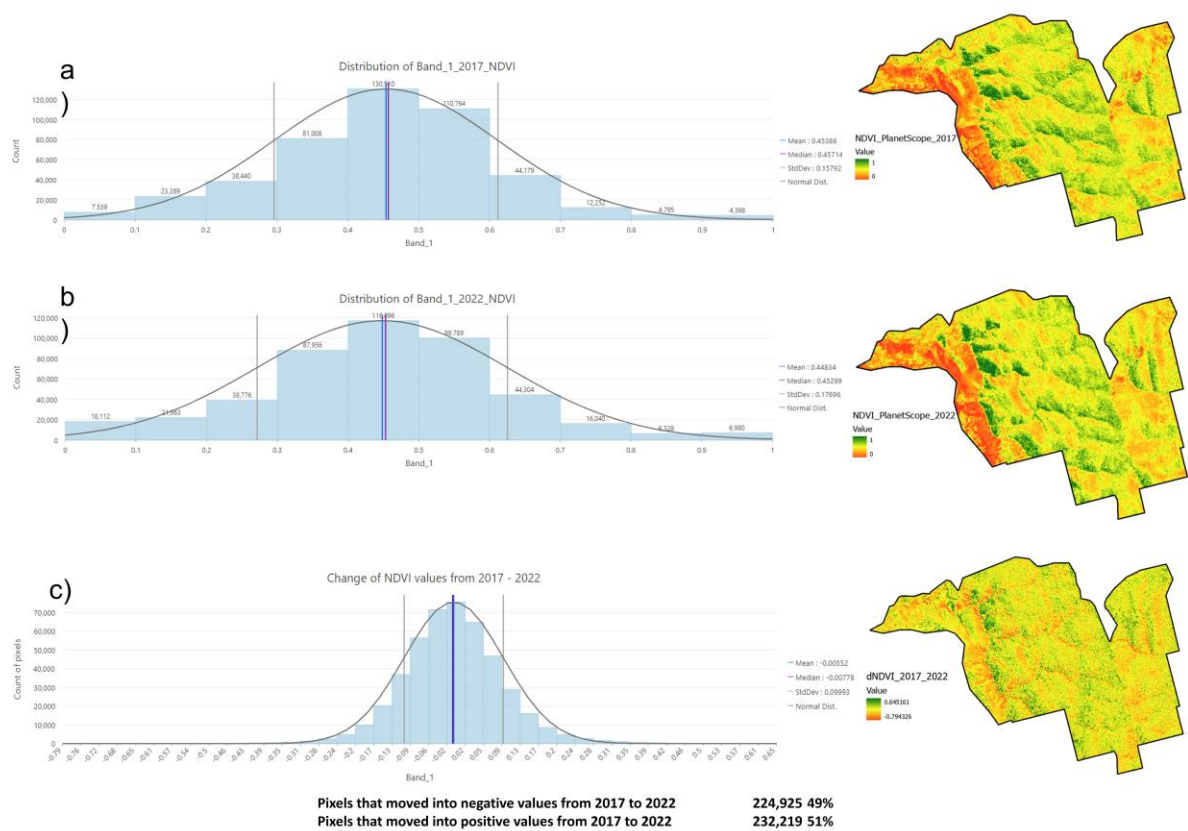

**Figure S1:** Histograms for a) 2017 and b) 2022 NDVI created from PlanetScope satellite imagery. c) Histogram representing the difference between the 2017 and 2022 NDVI, with results showing 49% of pixels moving negatively and 51% moving positively.

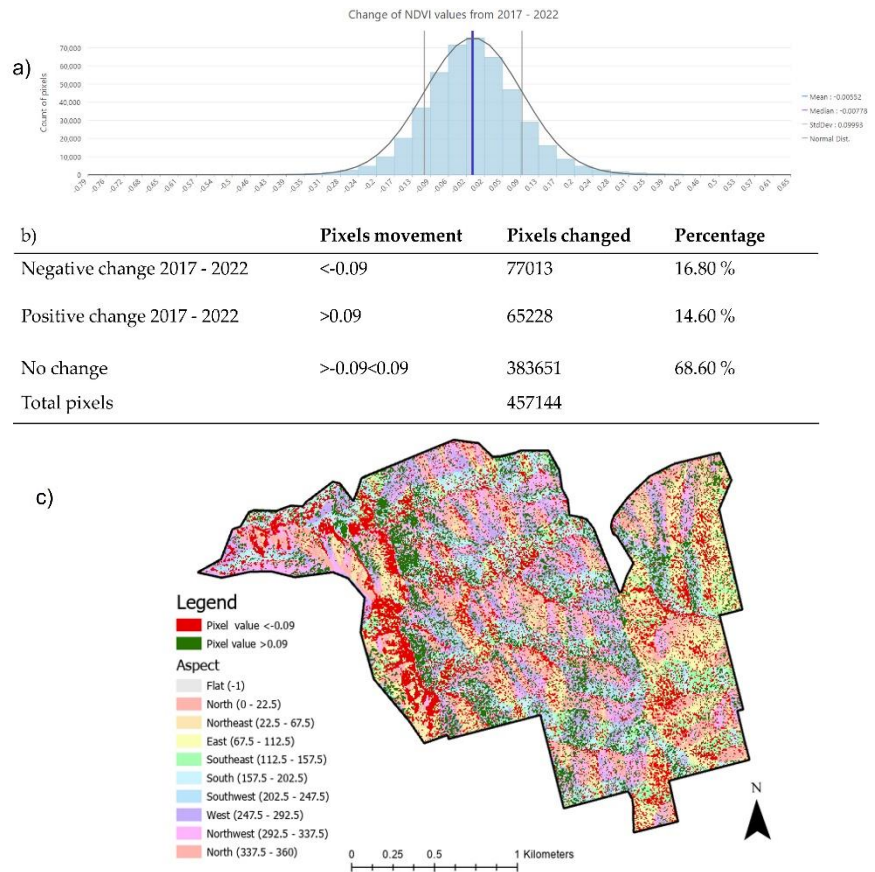

**Figure S2:** SGCP vegetation health changes were identified using PlanetScope satellite imagery from 2017 – 2022. a) Using the standard deviation threshold of the difference in NDVI histogram to understand changes in pixel values for vegetation health. b) For 68.60% of SGCP, NDVI shifted within 1 standard deviation, interpreted here as trivial variation. c) Significant shifts in vegetation health, interpreted here as greater than 1 standard deviation, occurred for 14.60% (positive; shown in green) and 16.80% (negative; shown in red) of pixels.

**Table S3:** Changes within vegetation health thresholds.

| Name of category      | Class name | Class From | Class To | Red | Green | Blue | Alpha | Count  | Area m2 | Area km2  | Change   |
|-----------------------|------------|------------|----------|-----|-------|------|-------|--------|---------|-----------|----------|
| Dead - dead           | 1->11      | 1          | 11       | 76  | 174   | 177  | 255   | 92     | 828     | 0.000828  | 0        |
| Dead - unhealthy      | 1->22      | 1          | 22       | 132 | 178   | 111  | 255   | 217    | 1953    | 0.001953  | Positive |
| Dead - moderate       | 1->33      | 1          | 33       | 150 | 160   | 160  | 255   | 1      | 9       | 0.0000009 | Positive |
| Dead - healthy        | 1->44      | 1          | 44       | 0   | 0     | 0    | 0     | 0      | 0       | 0         | 0        |
| Unhealthy - dead      | 2->11      | 2          | 11       | 101 | 171   | 172  | 255   | 468    | 4212    | 0.004212  | Negative |
| Unhealthy - unhealthy | 2->22      | 2          | 22       | 156 | 175   | 105  | 255   | 69918  | 629262  | 0.629262  | 0        |
| Unhealthy - moderate  | 2->33      | 2          | 33       | 174 | 157   | 154  | 255   | 21603  | 194427  | 0.194427  | Positive |
| Unhealthy - healthy   | 2->44      | 2          | 44       | 118 | 94    | 150  | 255   | 13     | 117     | 0.000117  | Positive |
| Moderate - dead       | 3->11      | 3          | 11       | 71  | 150   | 156  | 255   | 5      | 45      | 0.000045  | Negative |
| Moderate - unhealthy  | 3->22      | 3          | 22       | 127 | 154   | 90   | 255   | 23224  | 209016  | 0.209016  | Negative |
| Moderate - moderate   | 3->33      | 3          | 33       | 145 | 136   | 139  | 255   | 289077 | 2601693 | 2.601693  | 0        |
| Moderate - healthy    | 3->44      | 3          | 44       | 89  | 73    | 134  | 255   | 21847  | 196623  | 0.196623  | Positive |
| Healthy - dead        | 4->11      | 4          | 11       | 0   | 0     | 0    | 0     | 0      | 0       | 0         | 0        |
| Healthy - unhealthy   | 4->22      | 4          | 22       | 99  | 118   | 53   | 255   | 34     | 306     | 0.000306  | Negative |
| Healthy - moderate    | 4->33      | 4          | 33       | 117 | 99    | 102  | 255   | 8717   | 78453   | 0.078453  | Negative |
| Healthy - healthy     | 4->44      | 4          | 44       | 61  | 36    | 98   | 255   | 21687  | 195183  | 0.195183  | 0        |
| Total area of SGCP    |            |            |          |     |       |      |       |        |         | 4.1121189 |          |
